# Supplementary material for: Impact of invitation schemes on breast cancer screening coverage: A cohort study from Copenhagen, Denmark
Source: PubMed Central journal article supplement — J Med Screen. 2016 May 20;24(1):20–6. doi: 10.1177/0969141316641982 (PMC5414897; doi:10.1177/0969141316641982), 2016-05-20
Supplement: MSC641982_Supplementary_material.pdf [file MSC641982_Supplementary_material.pdf]

## APPENDIX

Appendix table 1. Dates for invitation rounds and birth cohorts invited for successive rounds of the mammography screening programme in Copenhagen, Denmark

| Invitation round | Invitation dates     |                    | Birth cohorts        |                    | Length of invitation round (years) |
|------------------|----------------------|--------------------|----------------------|--------------------|------------------------------------|
|                  | From Date,month,year | To Date,month,year | From Date,month,year | To Date,month,year |                                    |
| 1                | 04.04.1991           | 23.04.1993         | 31.03.1921           | 01.04.1941         | 2.05                               |
| 2                | 26.04.1993           | 31.05.1995         | 31.03.1923           | 31.03.1943         | 2.09                               |
| 3                | 01.06.1995           | 24.03.1997         | 01.04.1925           | 31.03.1945         | 1.81                               |
| 4                | 25.03.1997           | 19.04.1999         | 01.04.1927           | 31.03.1947         | 2.07                               |
| 5                | 20.04.1999           | 31.03.2001         | 01.04.1929           | 31.03.1949         | 1.95                               |
| 6                | 01.04.2001           | 31.05.2003         | 01.04.1931           | 31.03.1951         | 2.16                               |
| 7                | 01.06.2003           | 31.12.2005         | 01.04.1933           | 31.03.1953         | 2.58                               |
| 8                | 01.01.2006           | 14.04.2008         | 01.04.1935           | 31.12.1957         | 2.28                               |
| 9                | 14.04.2008           | 31.12.2009         | 01.01.1939           | 31.12.1959         | 1.71                               |
| 10               | 01.01.2010           | 31.12.2011         | 01.01.1940           | 31.12.1961         | 1.99                               |

Appendix table 2. Invitation pattern by invitation rounds 1-10 in the Copenhagen screening programme

| Excluded from invitation          | Invitation round                    |   |   |   |   |   |   |                            |                                |                |
|-----------------------------------|-------------------------------------|---|---|---|---|---|---|----------------------------|--------------------------------|----------------|
|                                   | Invitation by age at start of round |   |   |   |   |   |   | Invitation by attained age |                                |                |
|                                   | 1                                   | 2 | 3 | 4 | 5 | 6 | 7 | 8                          | 9                              | 10             |
| Not eligible                      | x                                   | x | x | x | x | x | x | x                          | x                              | x              |
| Active non-participants           | NR                                  | x | x | x | x | x | x | x                          | x                              | x              |
| Technical errors                  | -                                   | - | - | - | - | x | x | x                          | -                              | -              |
| Previous passive non-participants | -                                   | - | - | - | - | - |   | x <sup>a</sup>             | x <sup>b</sup> ,x <sup>c</sup> | x <sup>d</sup> |

NR: Not relevant as these women were invited for their first time

x: criteria used, -: criteria not used

a: Part of non-participants from round 7 not invited due to technical errors

b: Women who did not respond to the previous two invitation rounds (7+8) were not invited

c: Women previously administratively deleted due to technical errors were invited

d: Women who did not respond to the previous two invitation rounds (8+9) were not invited

Appendix table 3. Number of targeted, invited and participating women by invitation rounds and invitation numbers for cohorts of women first targeted by the Copenhagen screening programme at age 50-51

| Invitation round, first targeted= cohort number | Invitation number |      |      |      |      |      |      |      |      |      |
|-------------------------------------------------|-------------------|------|------|------|------|------|------|------|------|------|
|                                                 | 1                 | 2    | 3    | 4    | 5    | 6    | 7    | 8    | 9    | 10   |
| Number of targeted women                        |                   |      |      |      |      |      |      |      |      |      |
| 1                                               | 4353              | 4026 | 3760 | 3562 | 3378 | 3225 | 3051 | 2783 | 2608 | 1615 |
| 2                                               | 4574              | 4377 | 4159 | 3941 | 3770 | 3541 | 3224 | 3001 | 2846 |      |
| 3                                               | 5614              | 5247 | 4924 | 4692 | 4446 | 4110 | 3867 | 3677 |      |      |
| 4                                               | 6079              | 5659 | 5355 | 5089 | 4713 | 4396 | 4198 |      |      |      |
| 5                                               | 5675              | 5292 | 4977 | 4636 | 4375 | 4226 |      |      |      |      |
| 6                                               | 5483              | 5095 | 4727 | 4465 | 4297 |      |      |      |      |      |
| 7                                               | 5514              | 5001 | 4693 | 4511 |      |      |      |      |      |      |
| 8                                               | 5416              | 4996 | 4762 |      |      |      |      |      |      |      |
| 9                                               | NR                | 5282 | 4999 |      |      |      |      |      |      |      |
| Number of invited women                         |                   |      |      |      |      |      |      |      |      |      |
| 1                                               | 4160              | 3774 | 3400 | 3147 | 2952 | 2257 | 2074 | 1886 | 1997 | 276  |
| 2                                               | 4550              | 4016 | 3718 | 3488 | 2597 | 2396 | 2191 | 2401 | 2222 |      |
| 3                                               | 5386              | 4906 | 4545 | 3388 | 3112 | 2840 | 3170 | 2903 |      |      |
| 4                                               | 5810              | 5284 | 4182 | 3882 | 3515 | 3470 | 3217 |      |      |      |
| 5                                               | 5384              | 4913 | 4463 | 3931 | 3098 | 2896 |      |      |      |      |
| 6                                               | 5263              | 4673 | 4296 | 3228 | 3098 |      |      |      |      |      |
| 7                                               | 5165              | 4584 | 3532 | 3275 |      |      |      |      |      |      |
| 8                                               | 5169              | 4544 | 4213 |      |      |      |      |      |      |      |
| 9                                               | NR                | 4710 | 4356 |      |      |      |      |      |      |      |
| Number of participating women                   |                   |      |      |      |      |      |      |      |      |      |
| 1                                               | 3156              | 2658 | 2465 | 2275 | 2084 | 1914 | 1728 | 1572 | 1366 | 179  |
| 2                                               | 3218              | 2807 | 2614 | 2360 | 2163 | 2021 | 1853 | 1721 | 1551 |      |
| 3                                               | 3735              | 3330 | 2987 | 2759 | 2562 | 2373 | 2283 | 2111 |      |      |
| 4                                               | 4081              | 3523 | 3251 | 3045 | 2867 | 2677 | 2436 |      |      |      |
| 5                                               | 3627              | 3248 | 3112 | 2929 | 2609 | 2400 |      |      |      |      |
| 6                                               | 3438              | 3209 | 3014 | 2715 | 2515 |      |      |      |      |      |
| 7                                               | 3472              | 3107 | 2812 | 2614 |      |      |      |      |      |      |
| 8                                               | 3475              | 3150 | 2883 |      |      |      |      |      |      |      |
| 9                                               | NR                | 3222 | 2962 |      |      |      |      |      |      |      |

■ Invitation round 1-5
